# Supplementary material for: Muscle Synergies in Response to Biofeedback-Driven Gait Adaptations in Children With Cerebral Palsy
Source: PubMed Central journal article supplement (PMC6776587; doi:10.3389/fphys.2019.01208), 2019-09-27
Supplement: Data_Sheet_1.pdf [file Data_Sheet_1.pdf]

**Supplementary 1.** Individual participants plots for synergy timing pattern (left) for the four-synergy solution. Corresponding muscle weightings (right) of each synergy pattern across feedback trials. Gluteus medius (GM), rectus femoris (RF), vastus lateralis (VL), semitendinosus (ST), tibialis anterior (TA), gastrocnemius medialis (GA), soleus (SO), and peroneus longus (PL).

TD
  Baseline
  Step Length
  Knee Extension
  Ankle Power

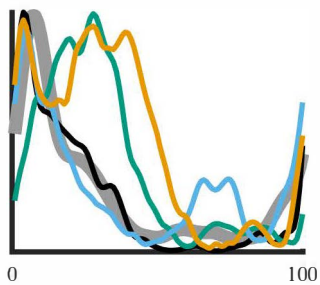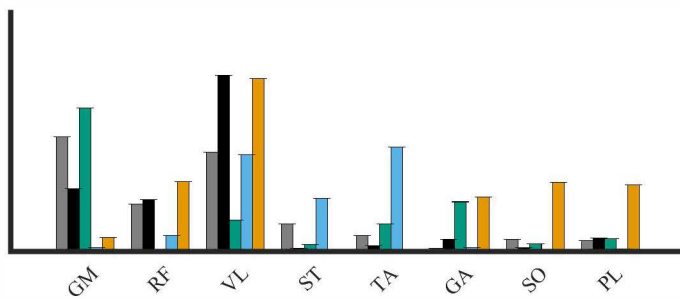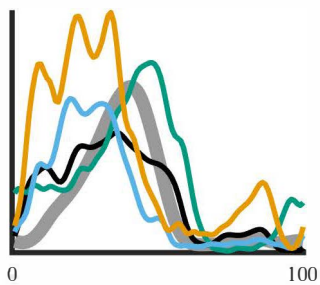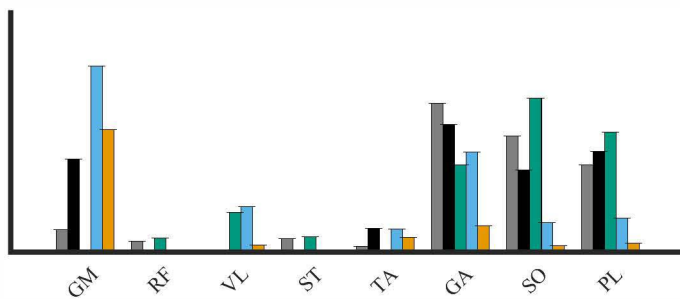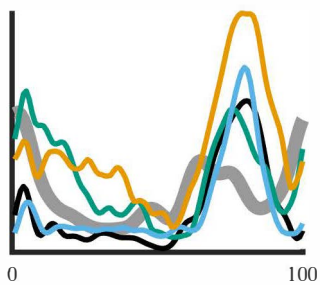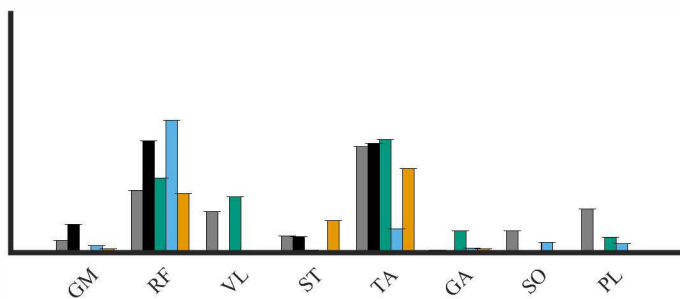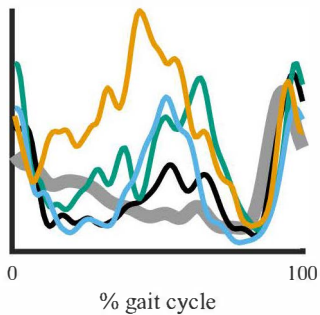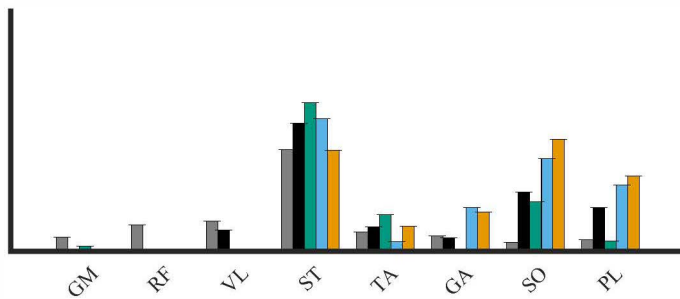

\*High-responder to biofeedback

TD
  Baseline
  Step Length
  Knee Extension
  Ankle Power

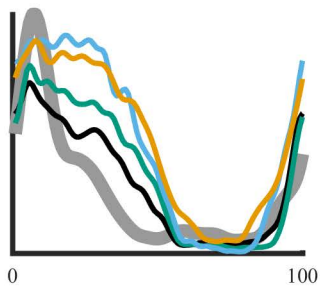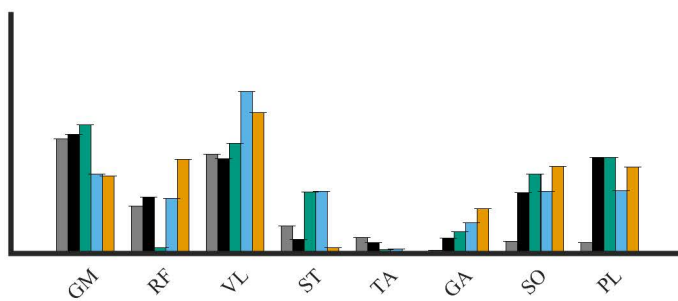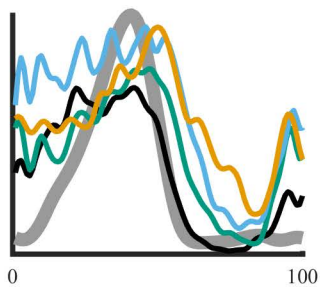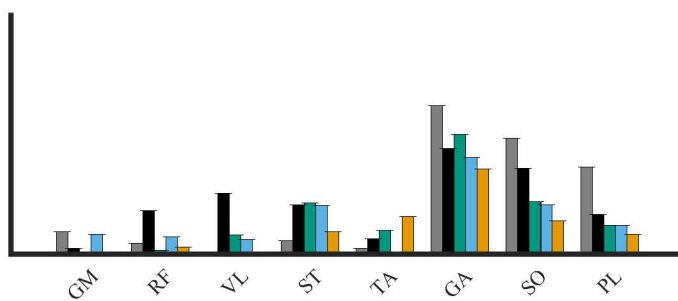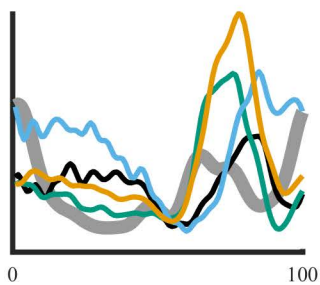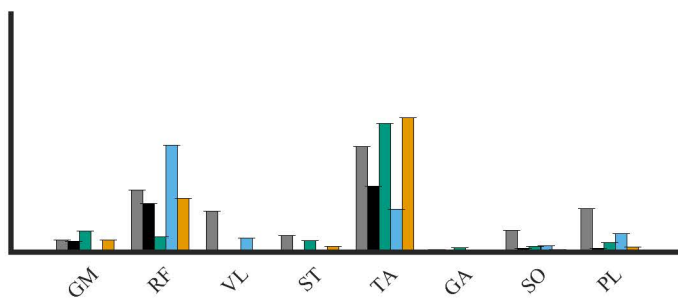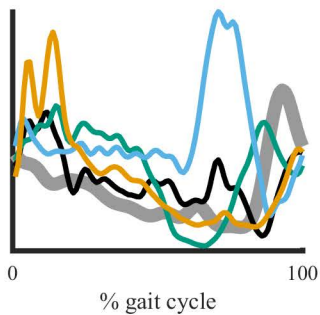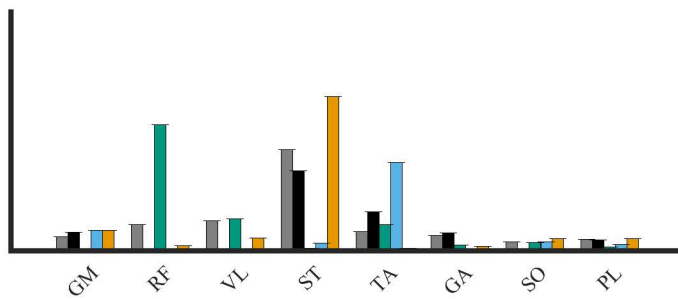

% gait cycle

TD
  Baseline
  Step Length
  Knee Extension
  Ankle Power

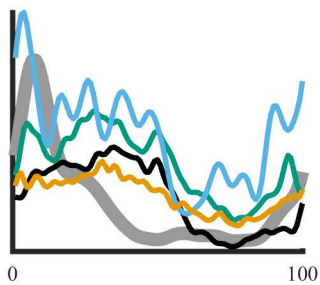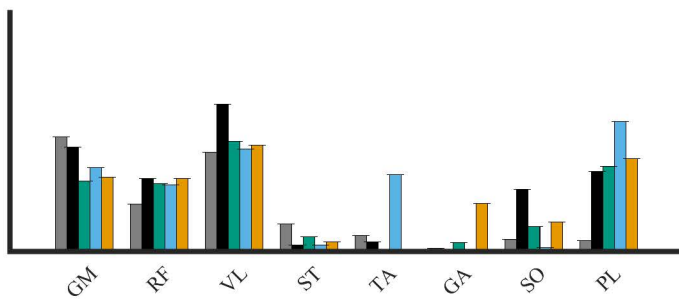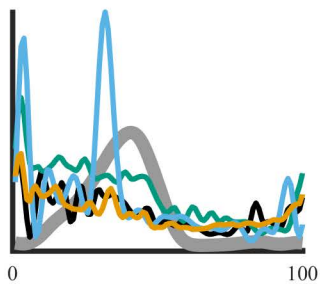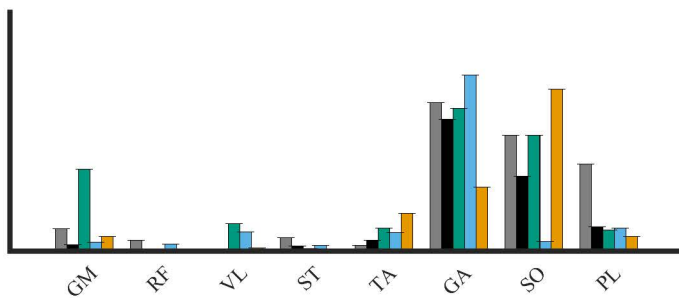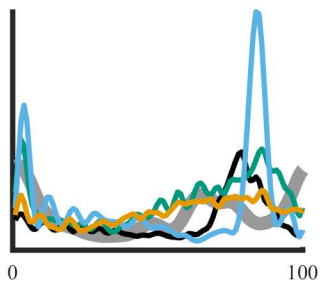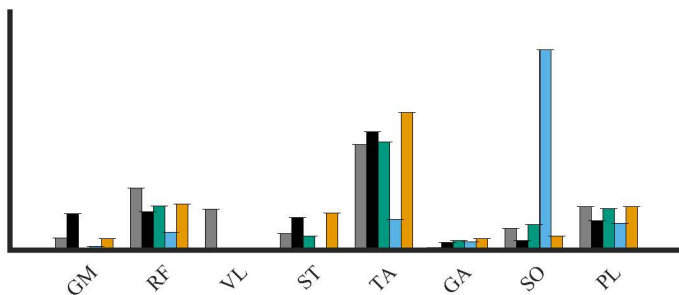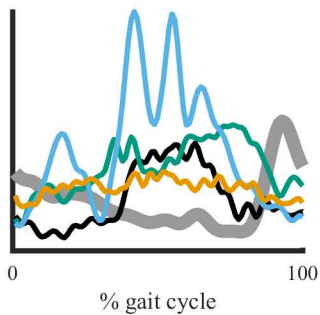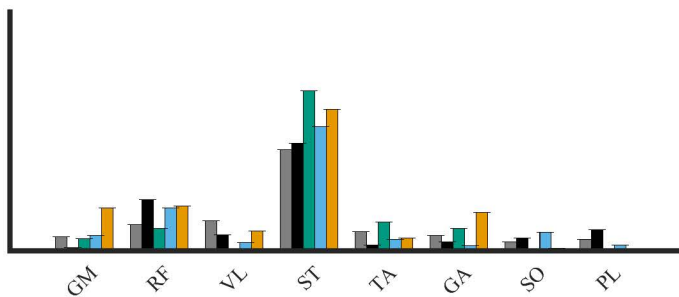

TD
  Baseline
  Step Length
  Knee Extension
  Ankle Power

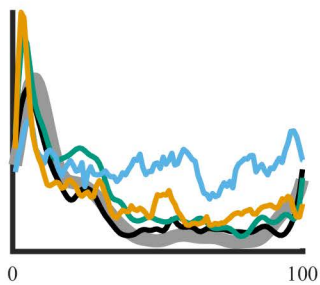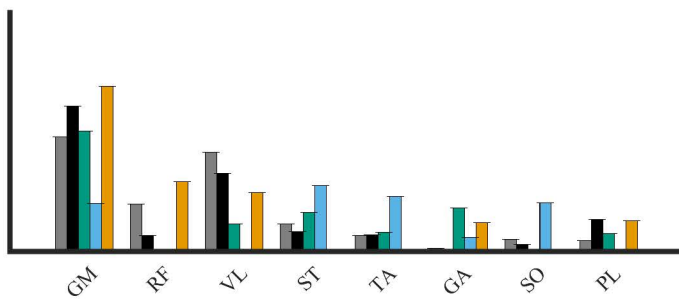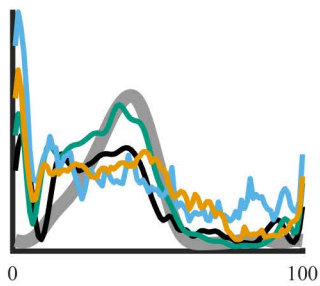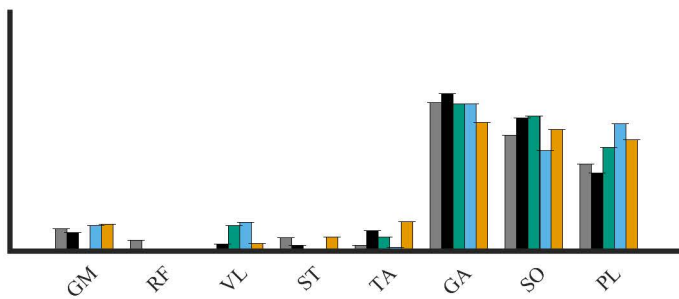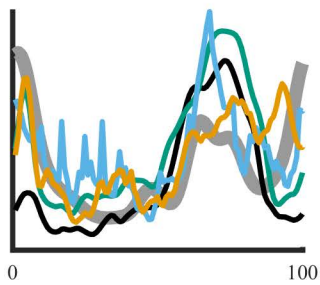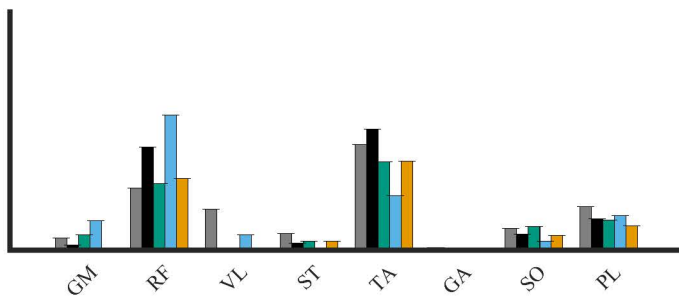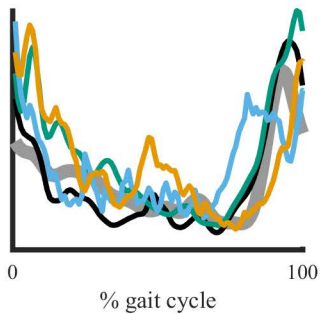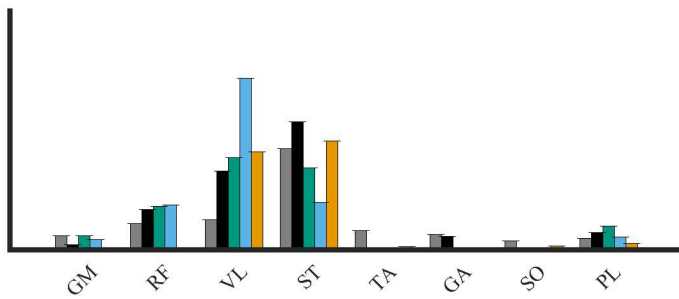

TD
  Baseline
  Step Length
  Knee Extension
  Ankle Power

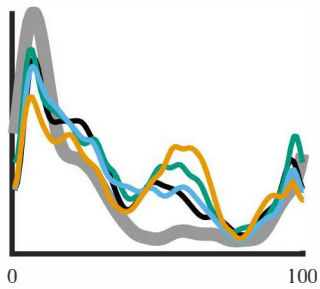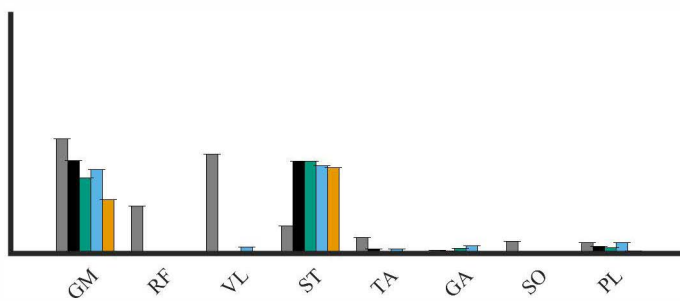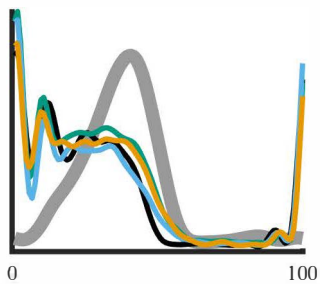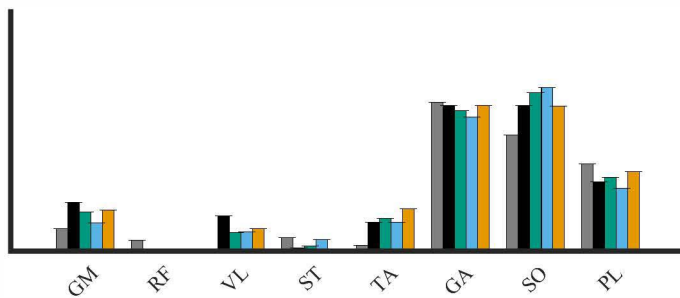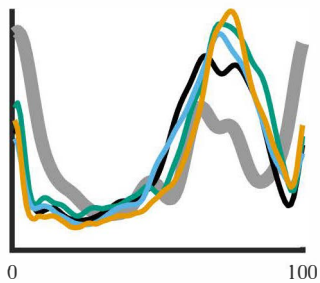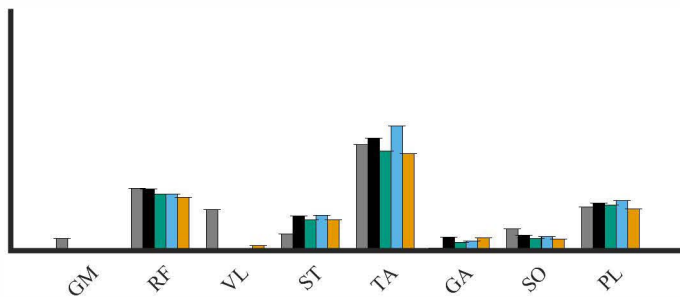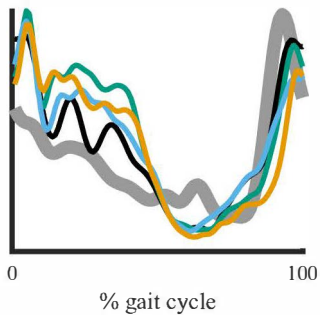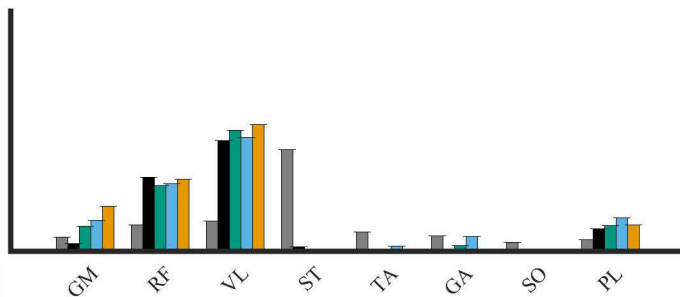

\*Low-responder to biofeedback

TD
  Baseline
  Step Length
  Knee Extension
  Ankle Power

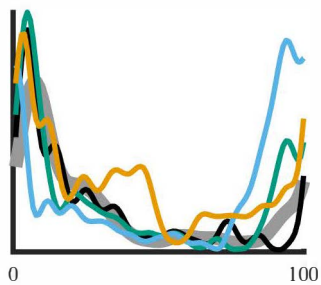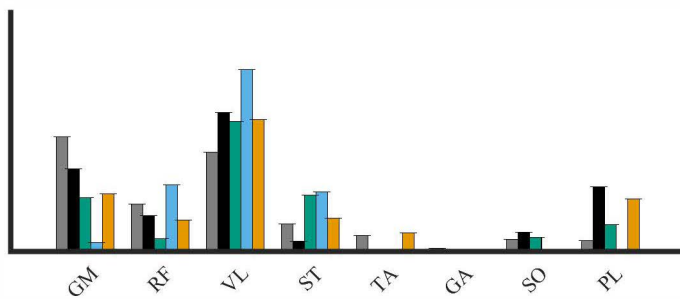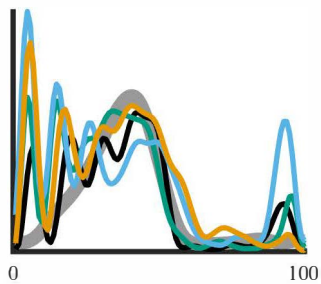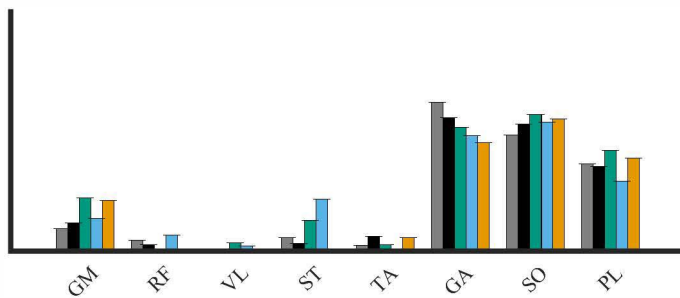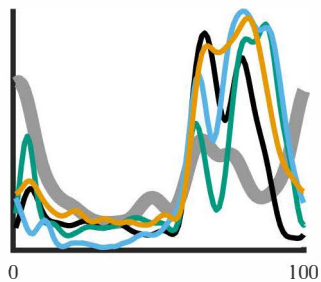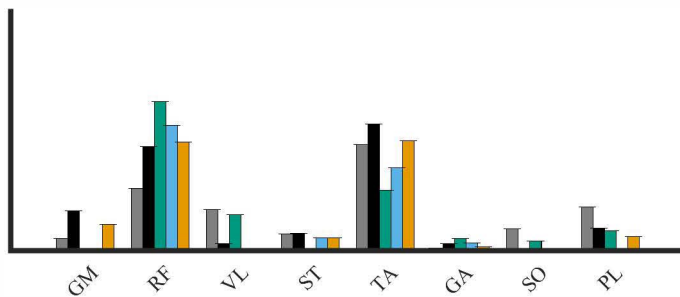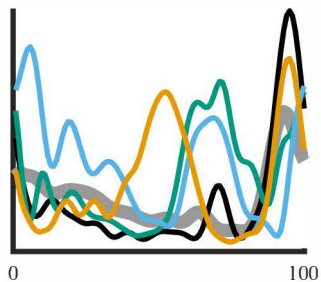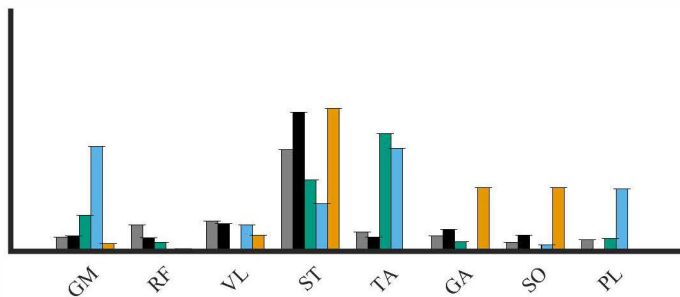

% gait cycle

\*High-responder to biofeedback

TD
  Baseline
  Step Length
  Knee Extension
  Ankle Power

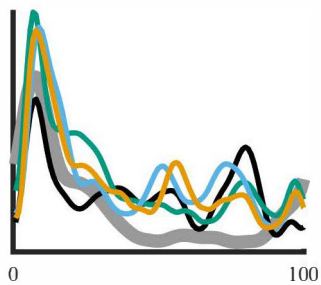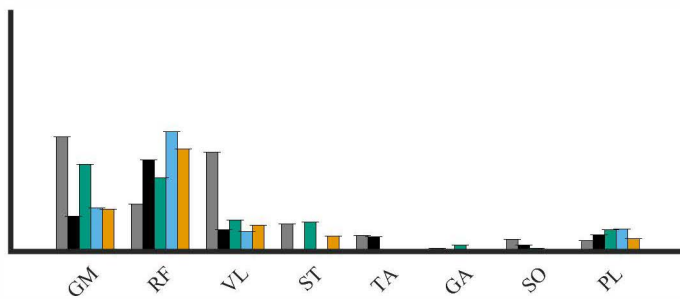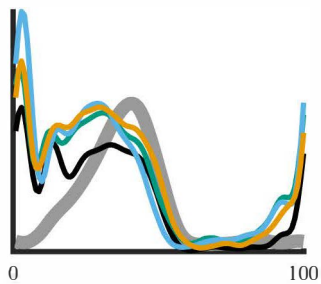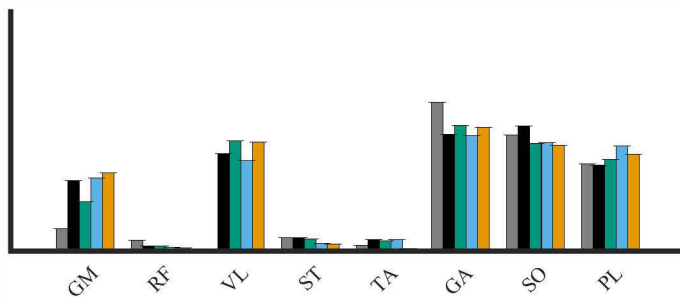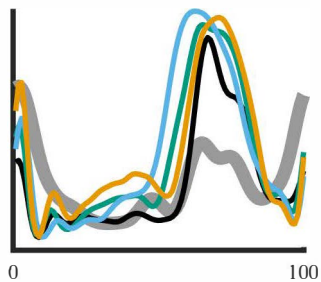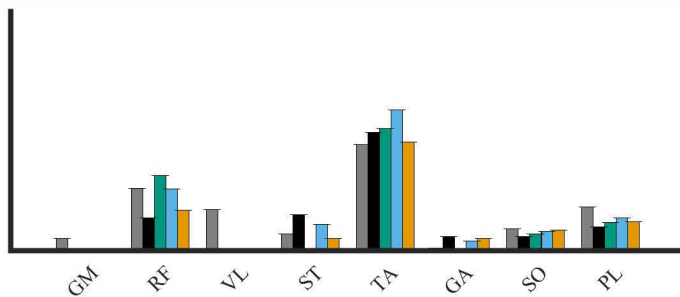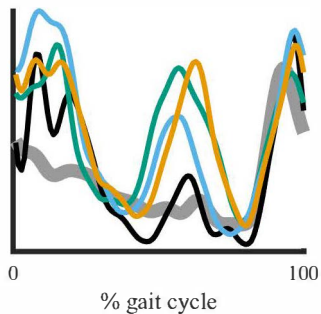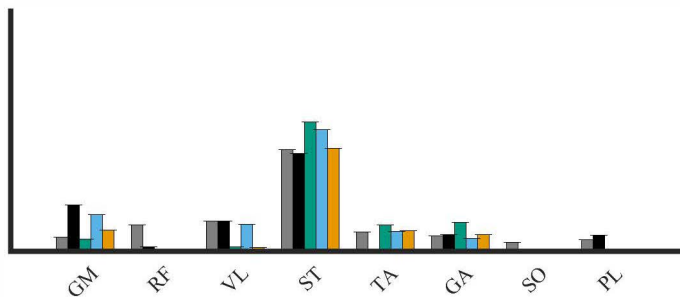

\*Low-responder to biofeedback



TD
  Baseline
  Step Length
  Knee Extension
  Ankle Power

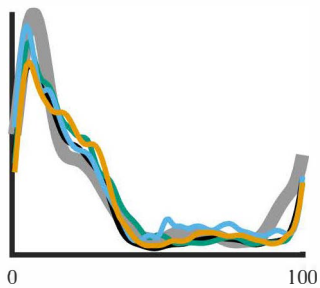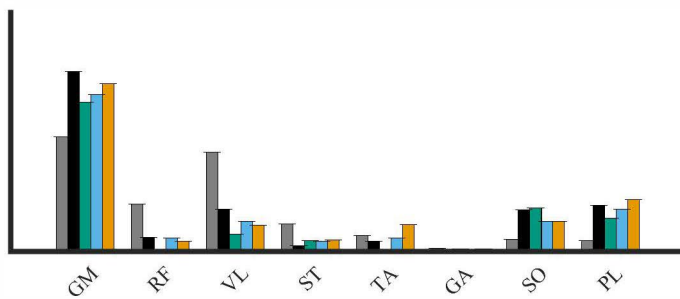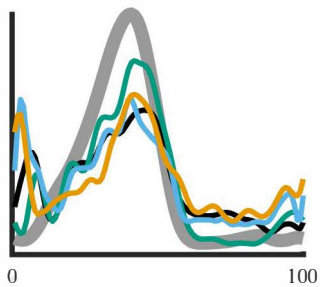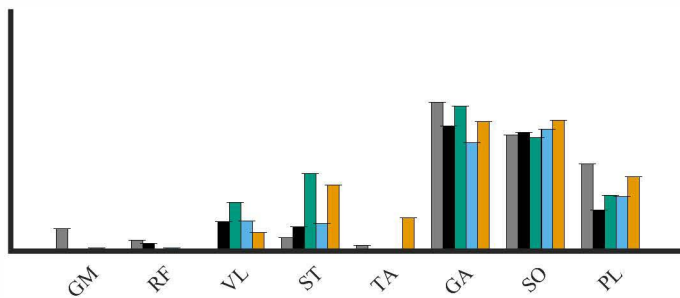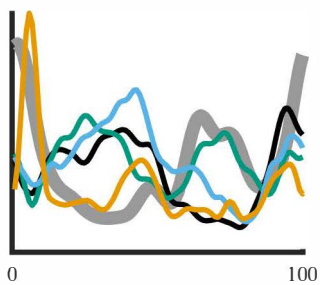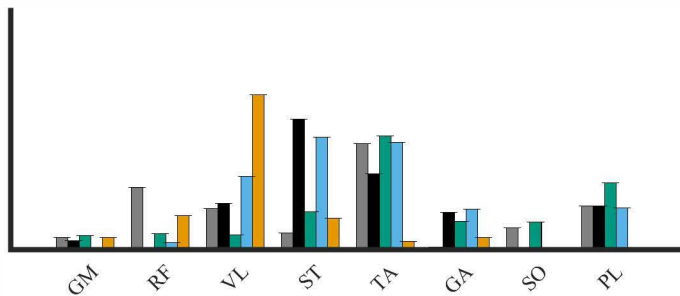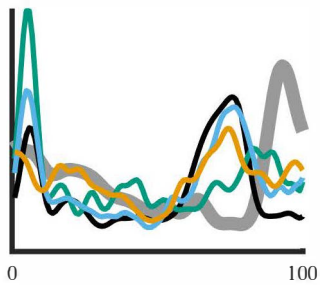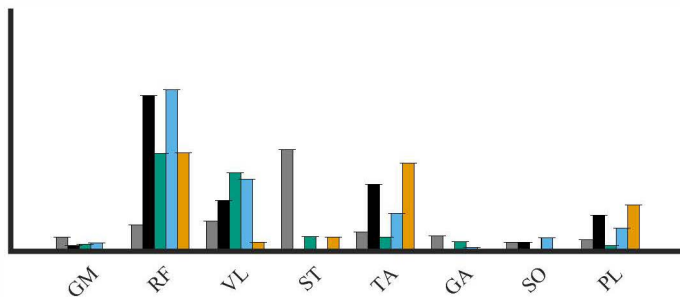

% gait cycle

\*Low-responder to biofeedback

TD
  Baseline
  Step Length
  Knee Extension
  Ankle Power

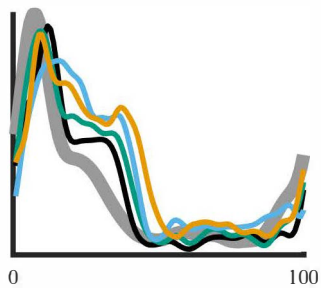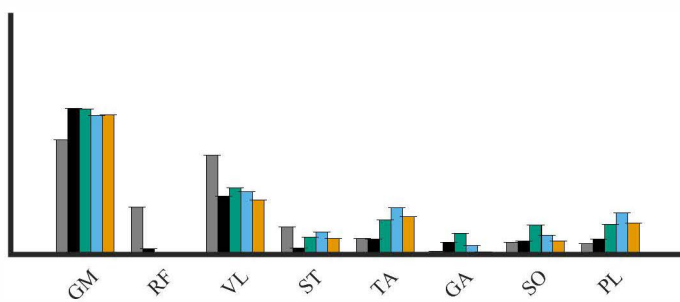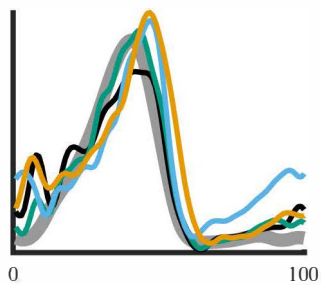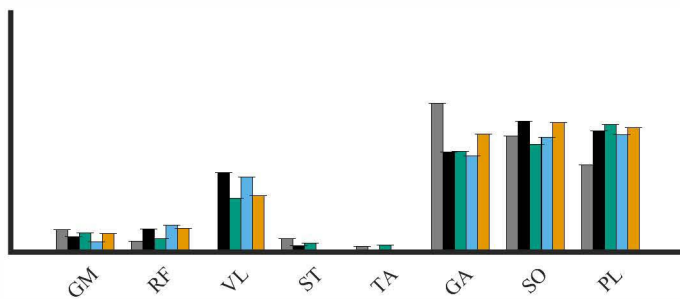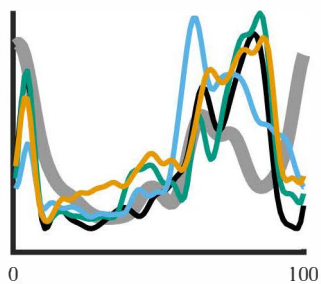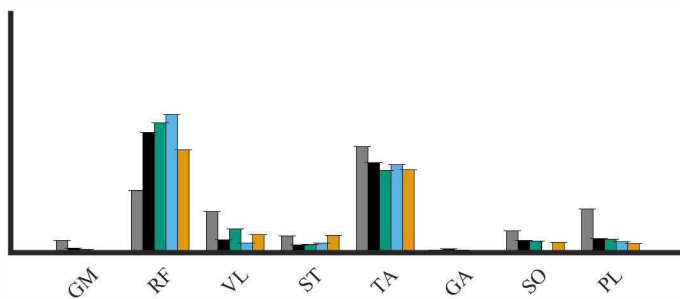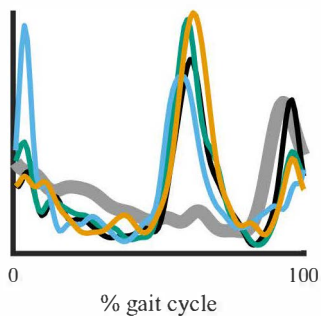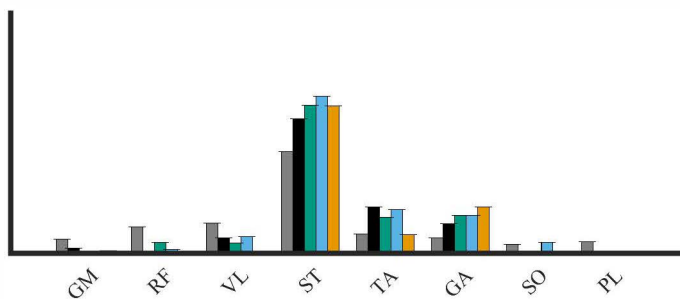

\*High-responder to biofeedback

TD
  Baseline
  Step Length
  Knee Extension
  Ankle Power

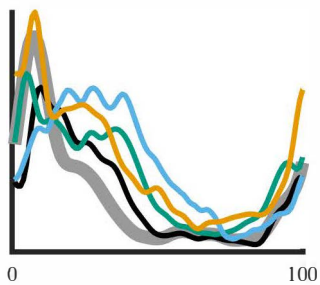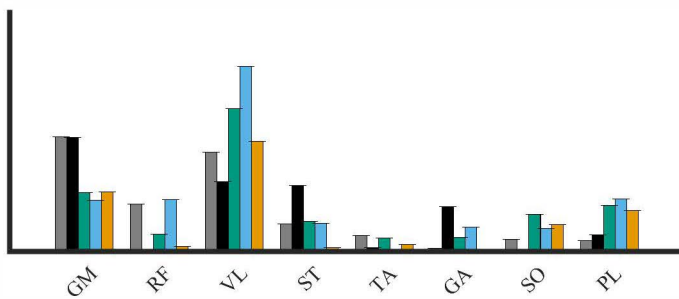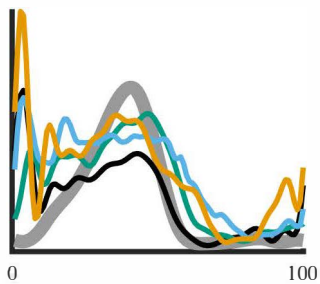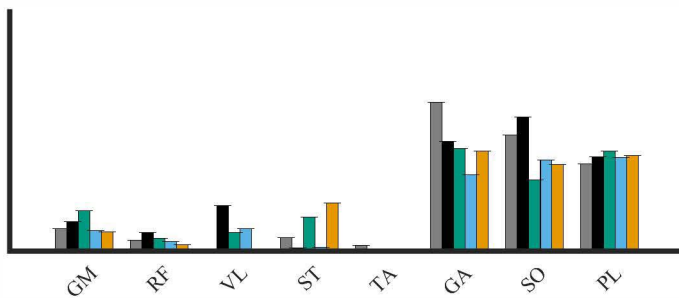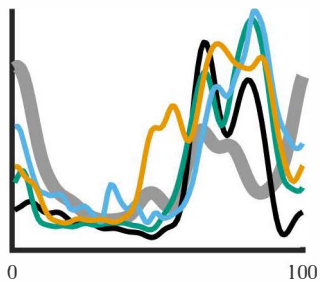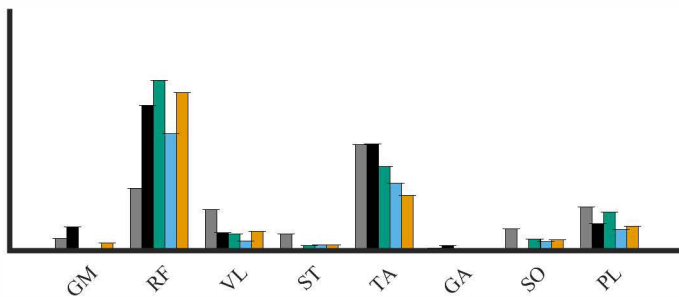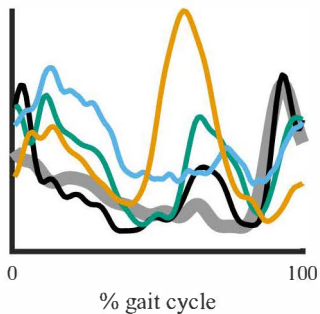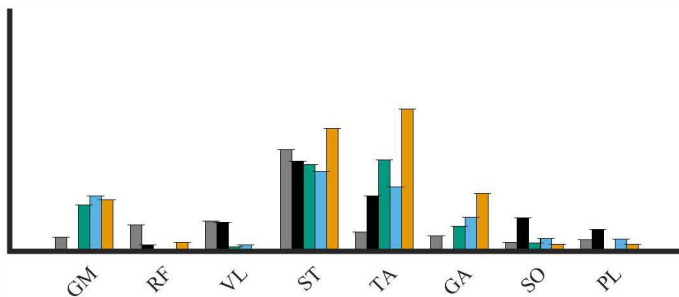

\*Low-responder to biofeedback

TD
  Baseline
  Step Length
  Knee Extension
  Ankle Power

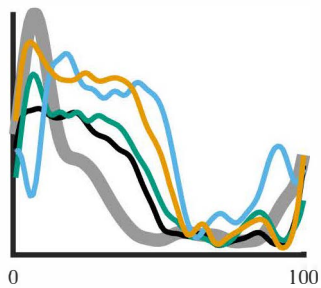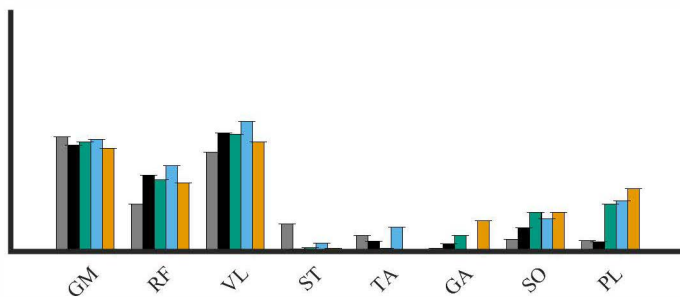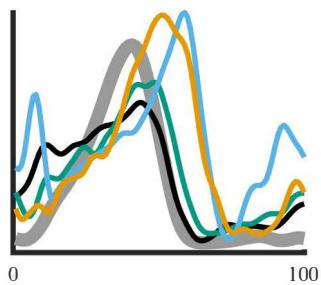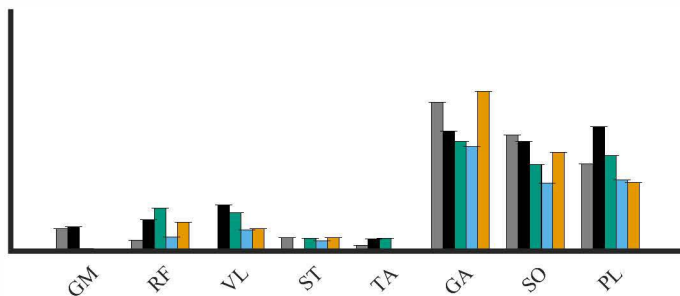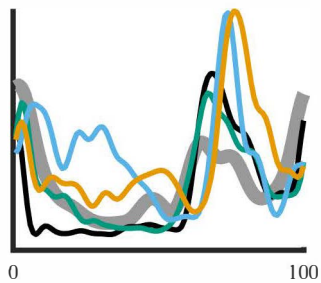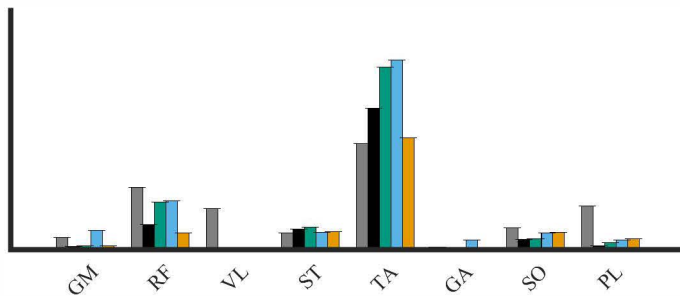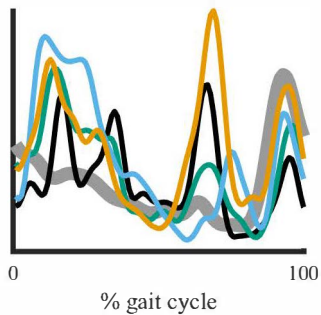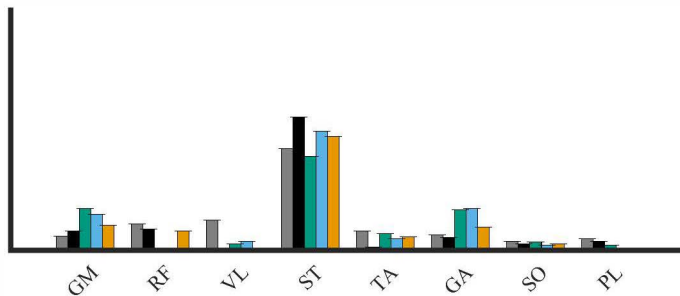

\*High-responder to biofeedback

TD
  Baseline
  Step Length
  Knee Extension
  Ankle Power

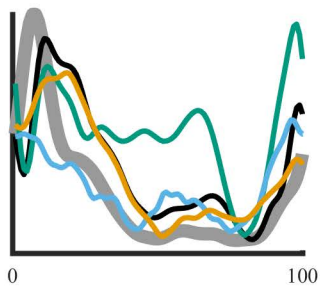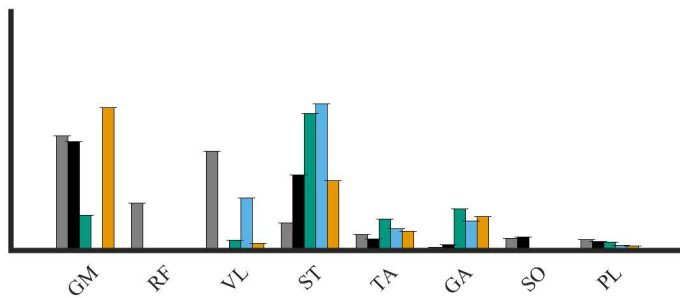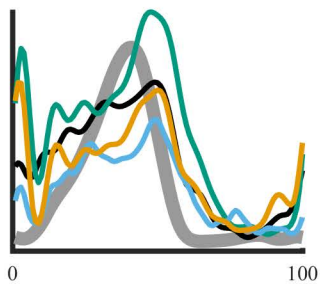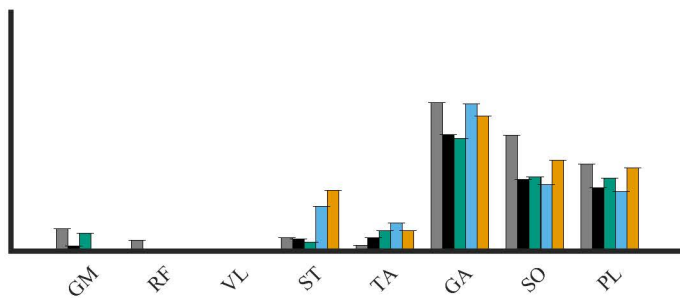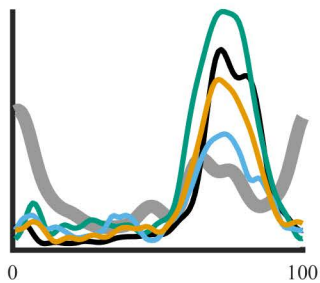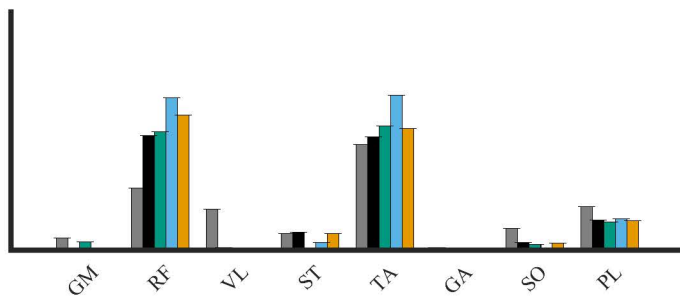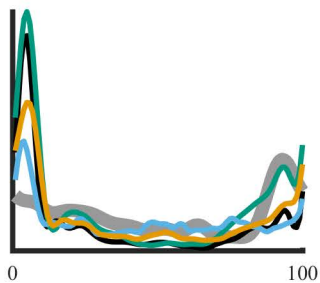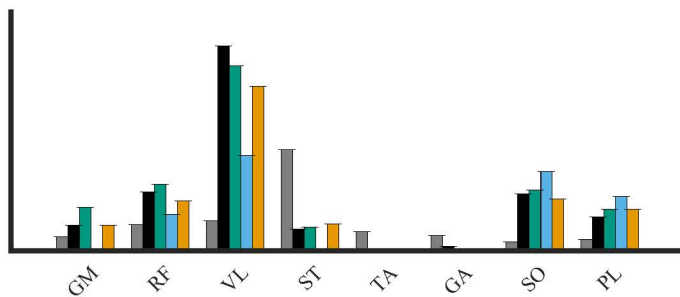

% gait cycle

TD
  Baseline
  Step Length
  Knee Extension
  Ankle Power

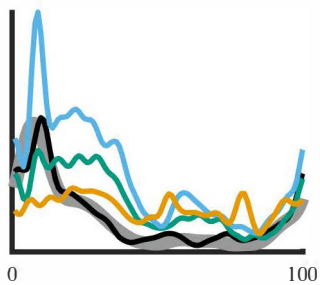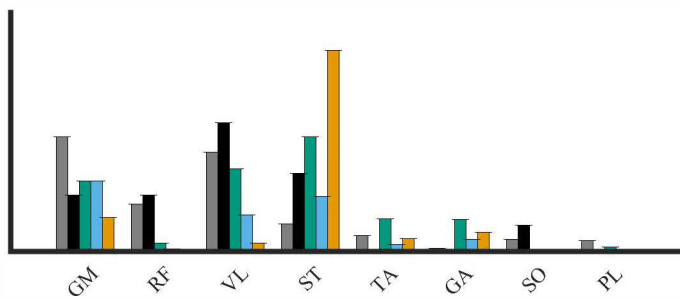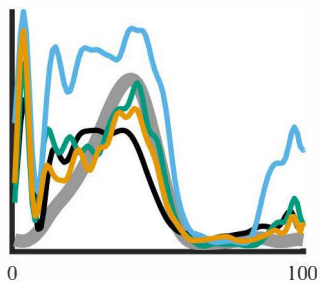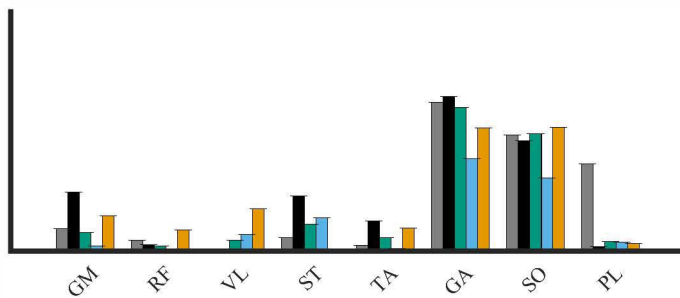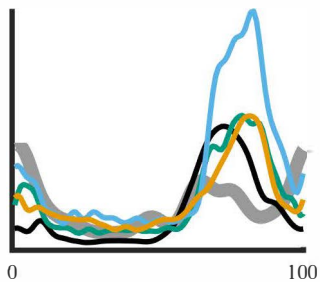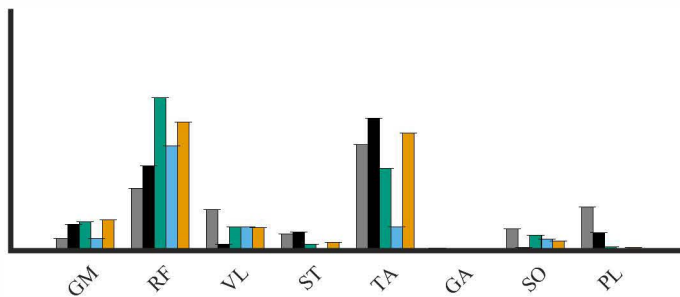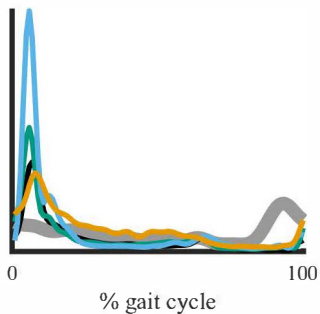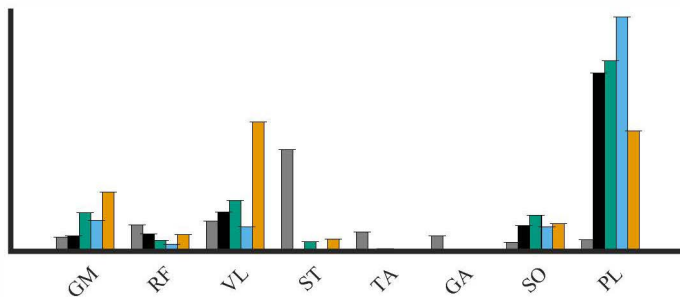

\*High-responder to biofeedback

TD
  Baseline
  Step Length
  Knee Extension
  Ankle Power

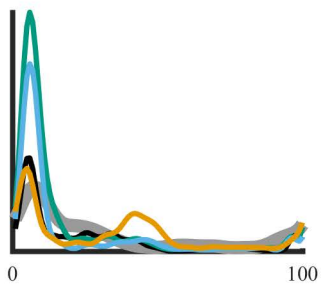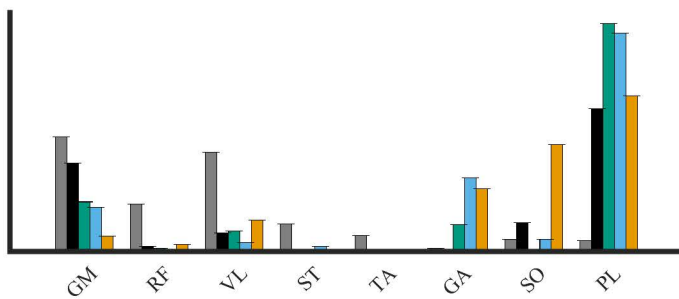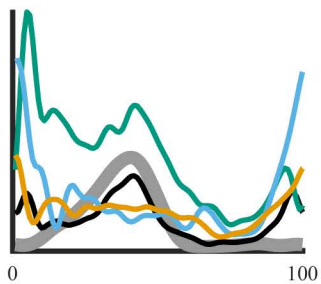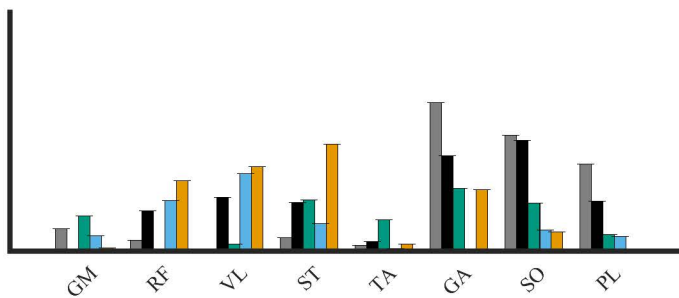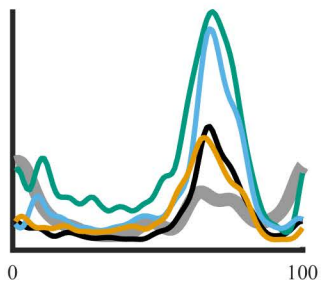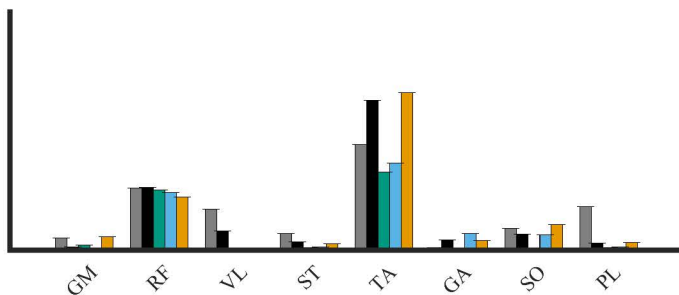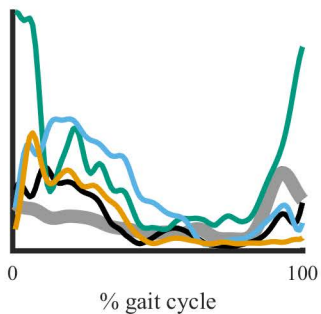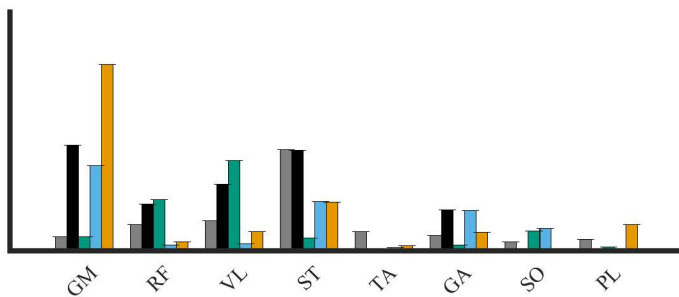

% gait cycle

TD
  Baseline
  Step Length
  Knee Extension
  Ankle Power

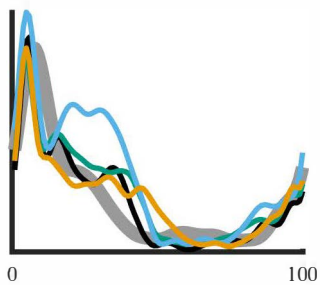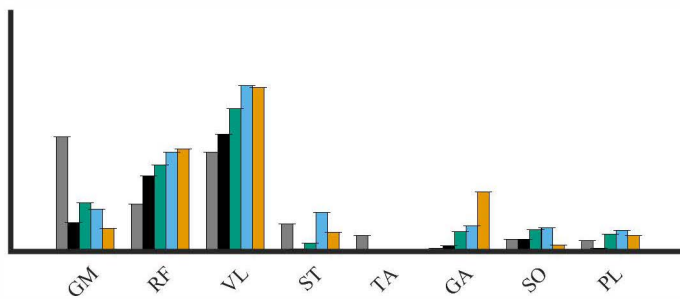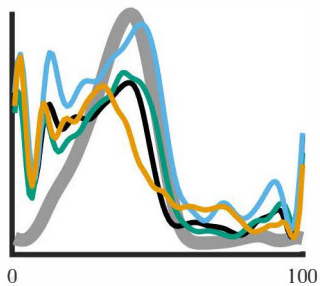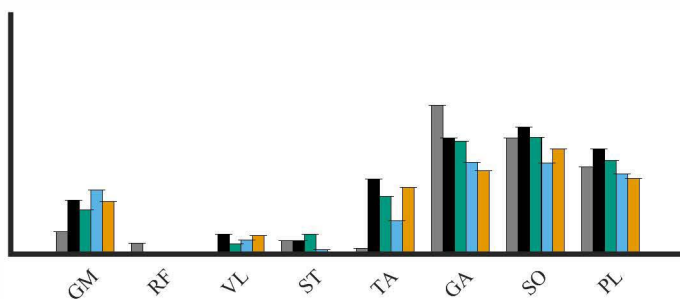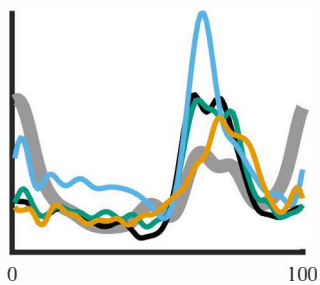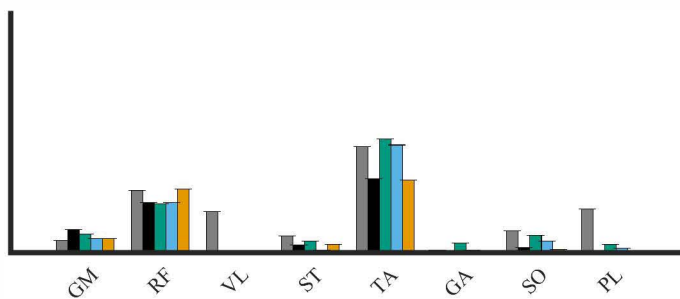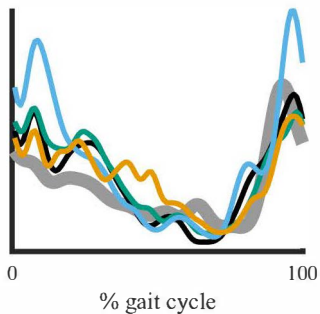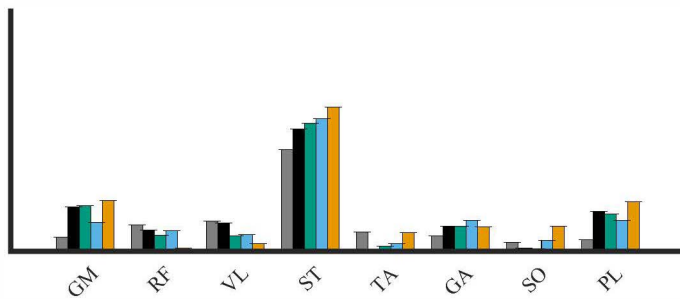

\*Low-responder to biofeedback



TD
  Baseline
  Step Length
  Knee Extension
  Ankle Power

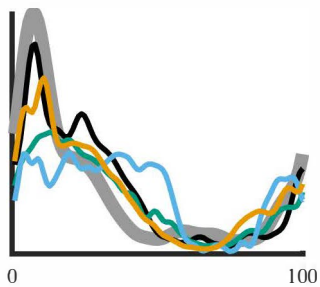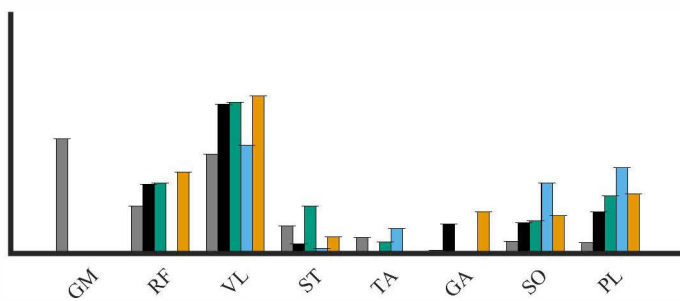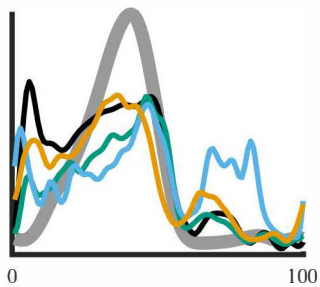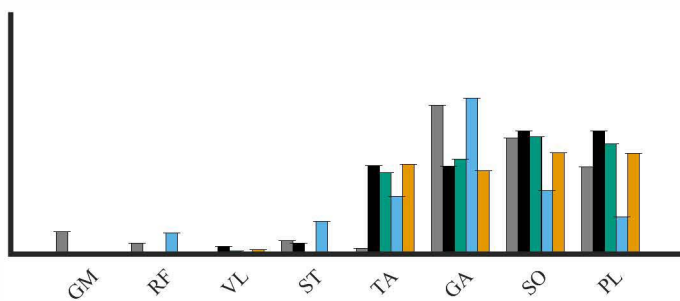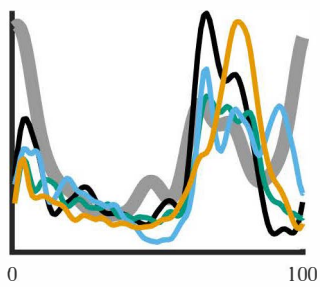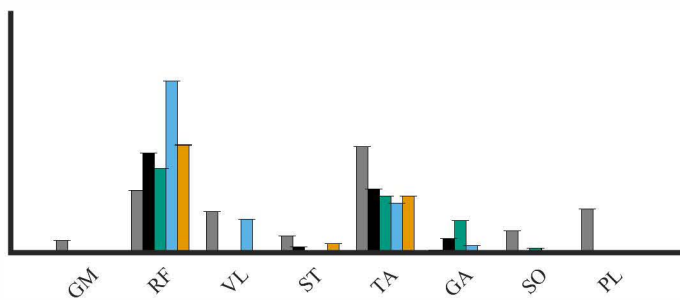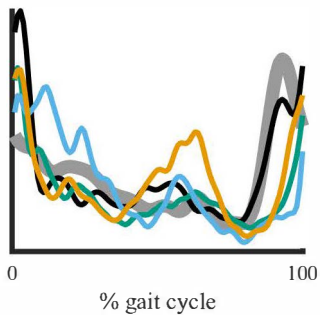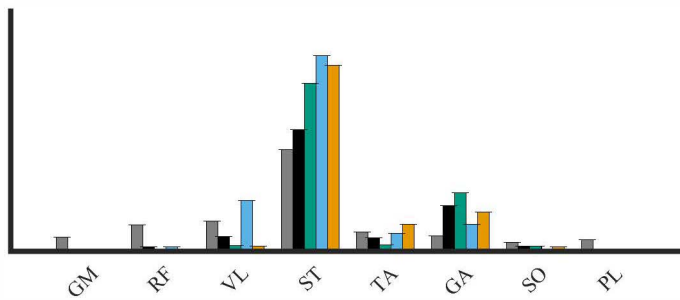

\*Low-responder to biofeedback

TD
  Baseline
  Step Length
  Knee Extension
  Ankle Power

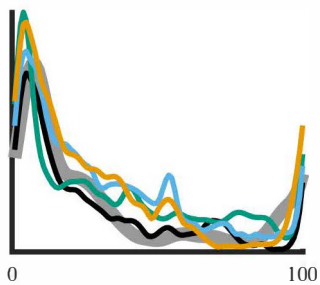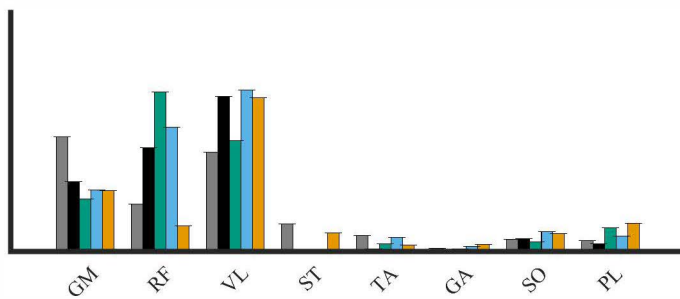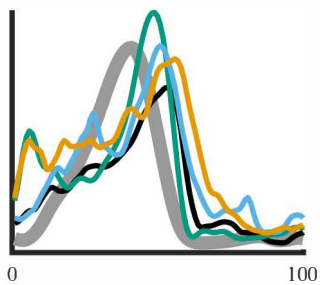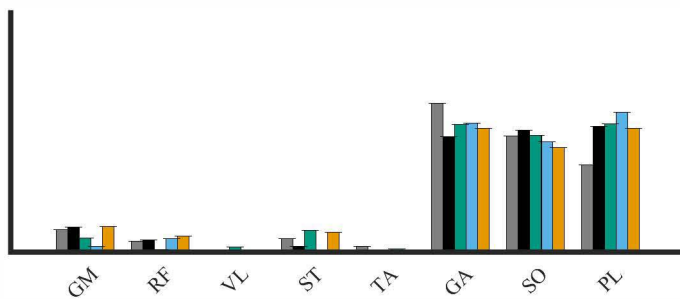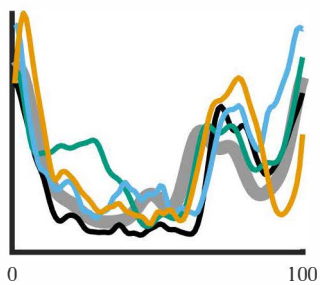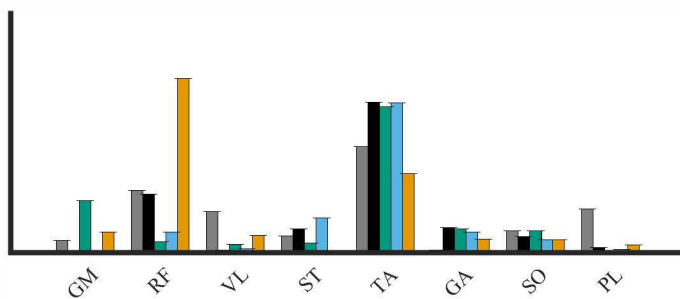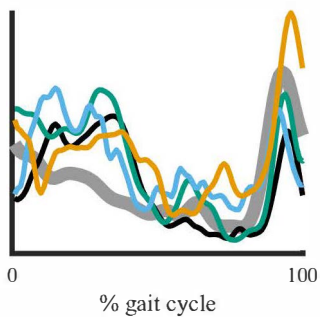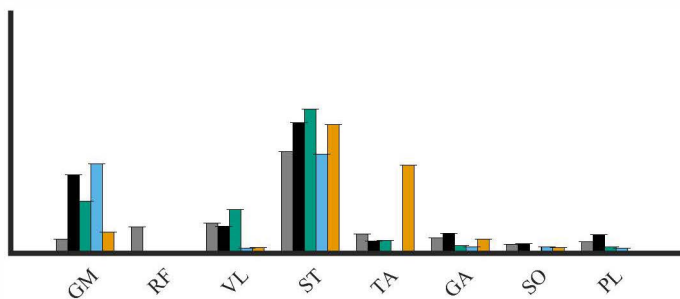

\*Low-responder to biofeedback

TD
  Baseline
  Step Length
  Knee Extension
  Ankle Power

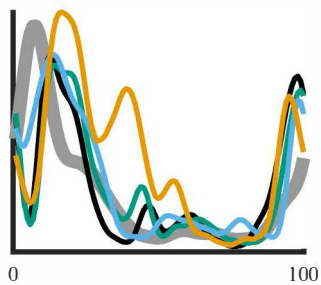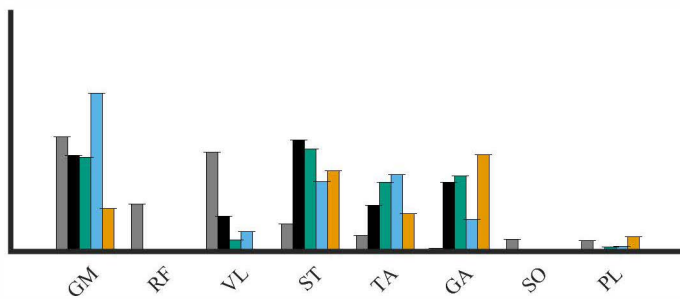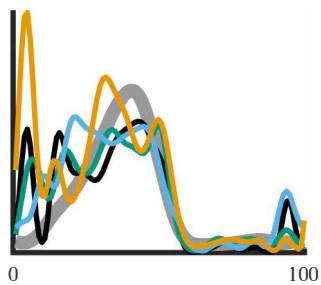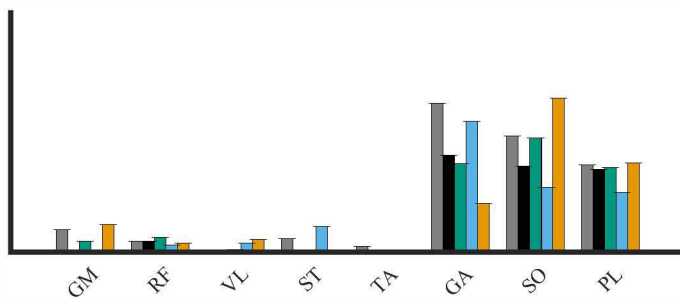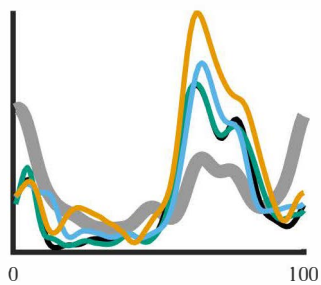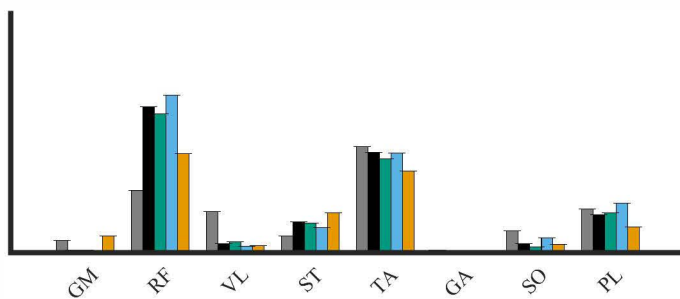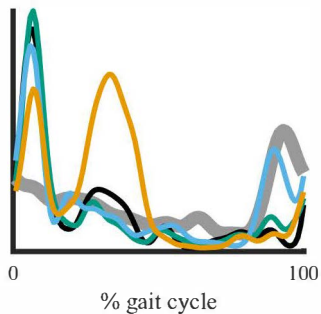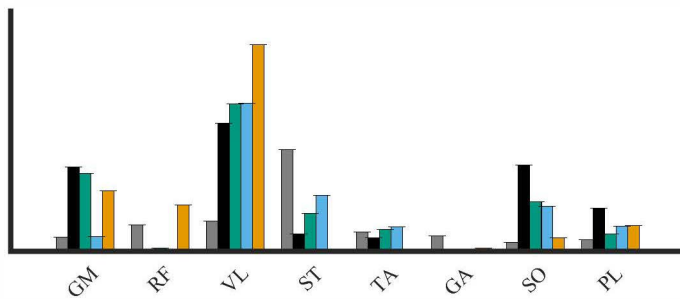

\*High-responder to biofeedback

TD
  Baseline
  Step Length
  Knee Extension
  Ankle Power

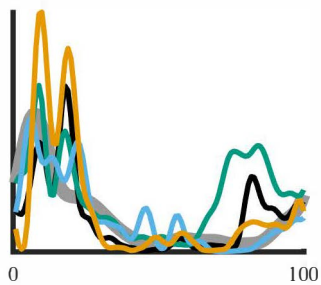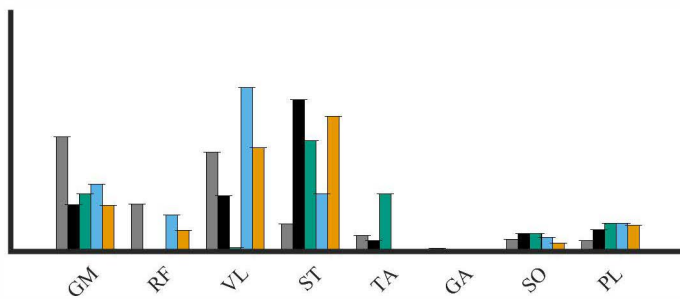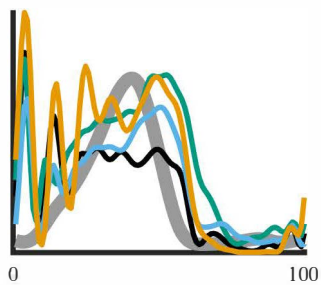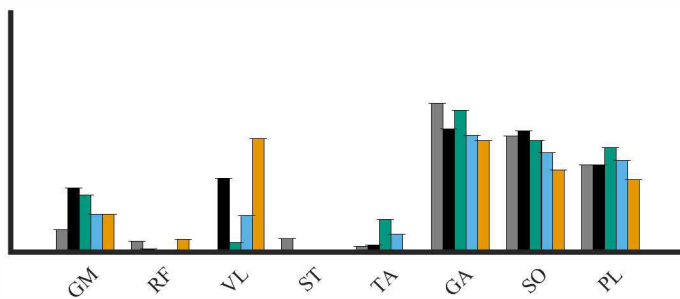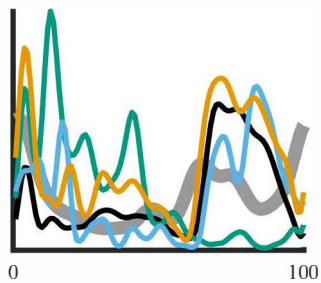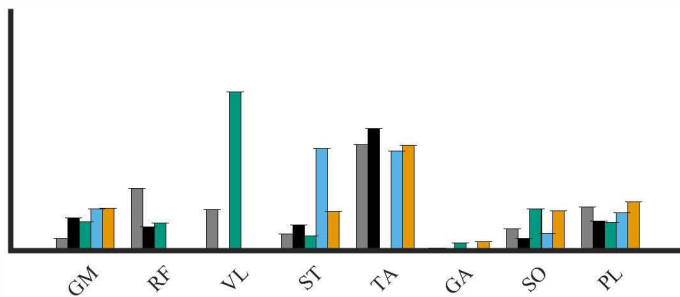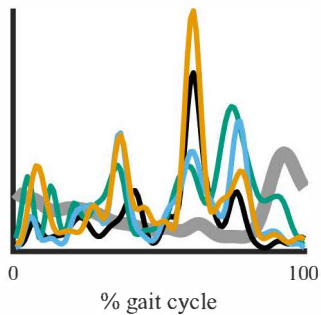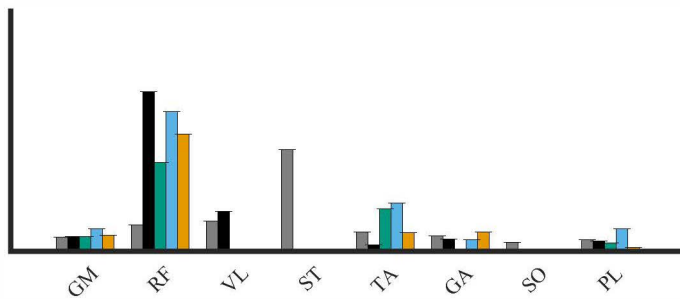

\*Low-responder to biofeedback

TD
  Baseline
  Step Length
  Knee Extension
  Ankle Power

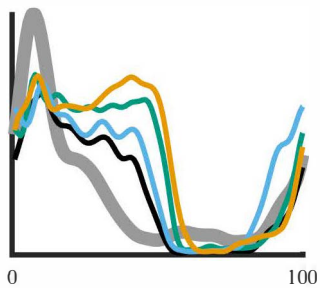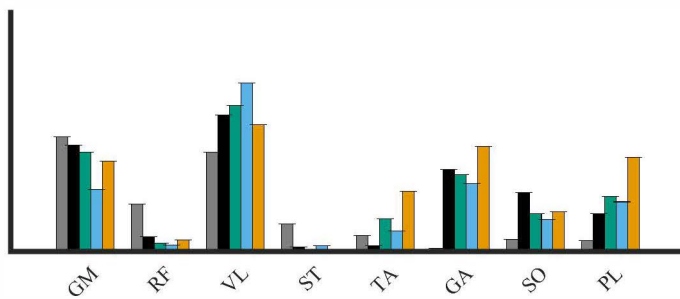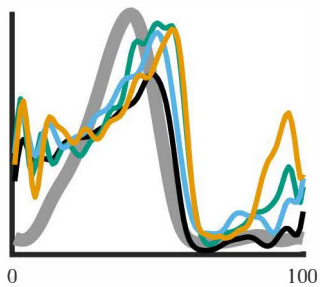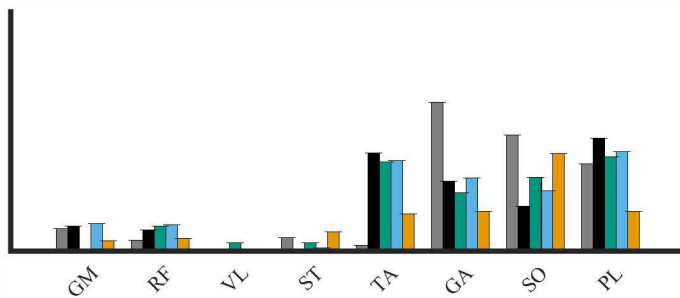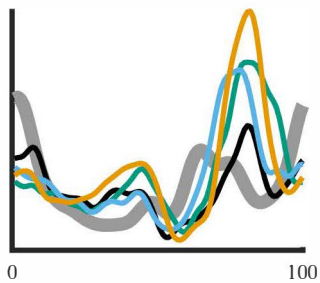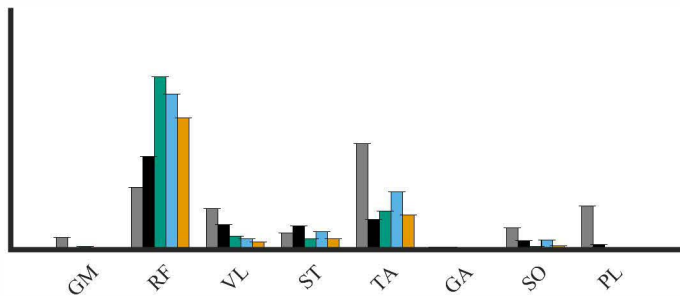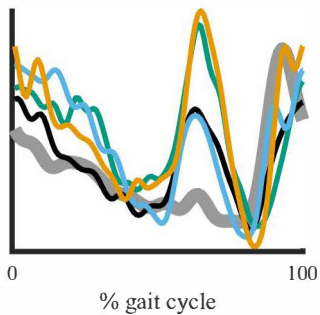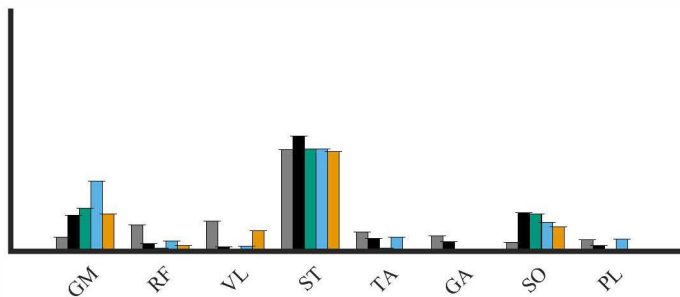

\*High-responder to biofeedback

TD
  Baseline
  Step Length
  Knee Extension
  Ankle Power

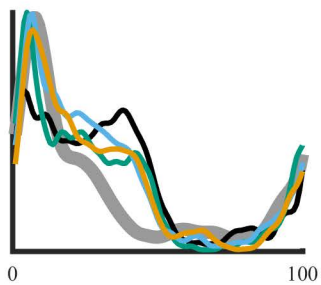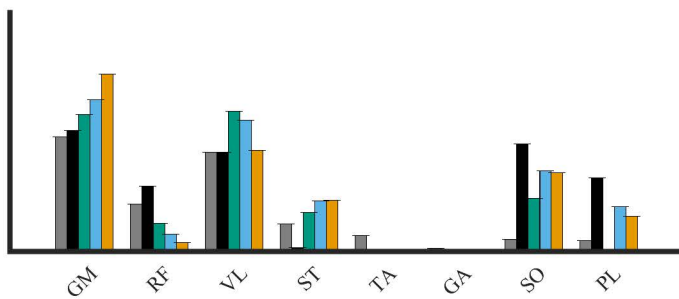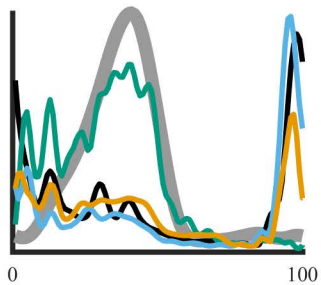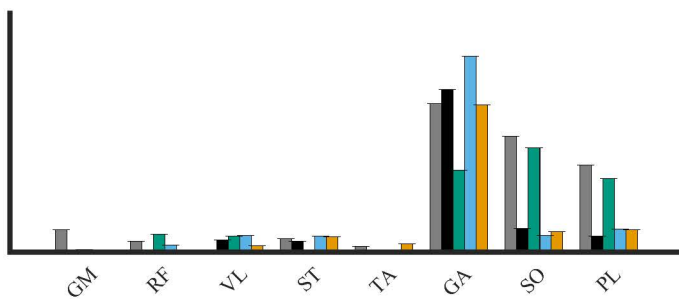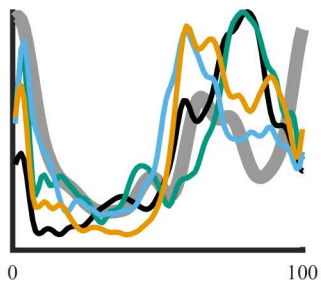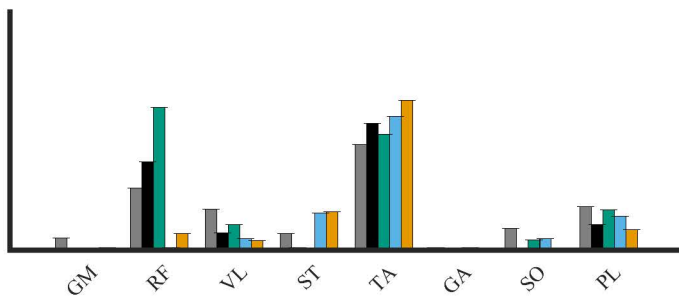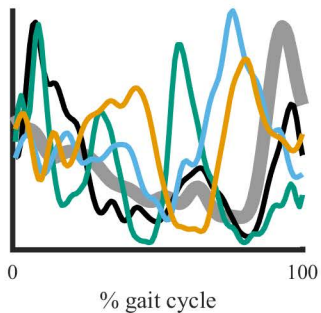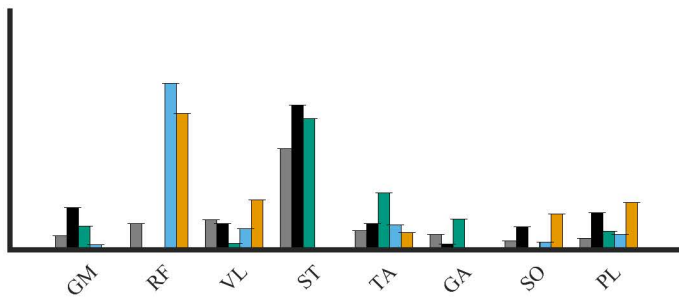

TD
  Baseline
  Step Length
  Knee Extension
  Ankle Power

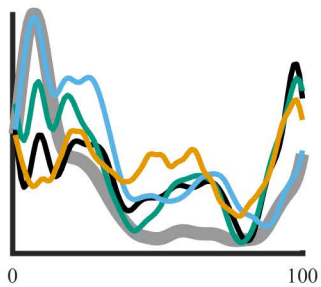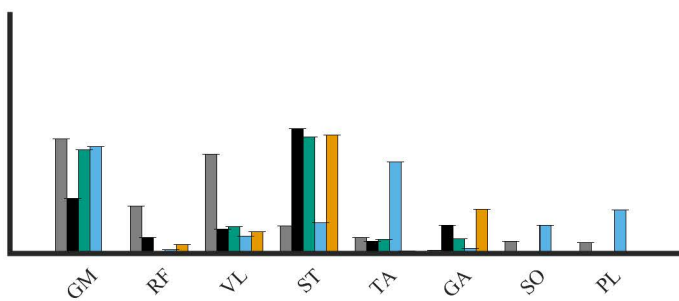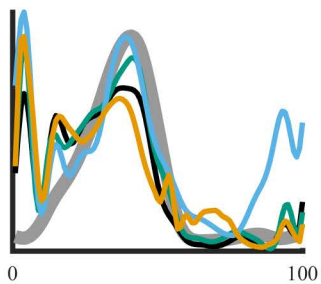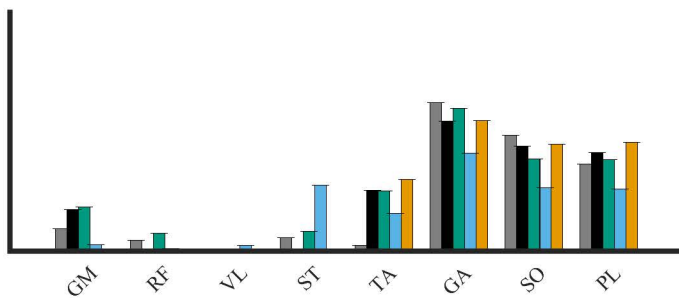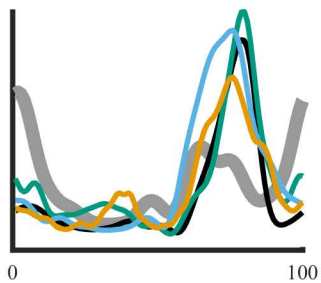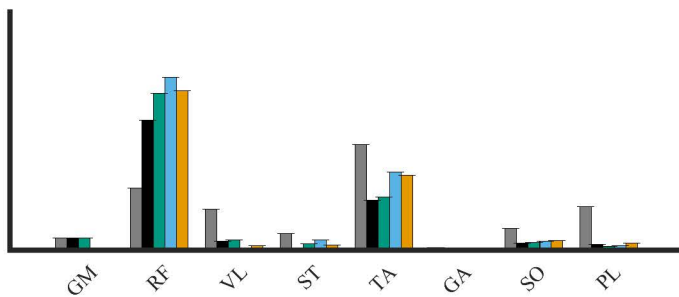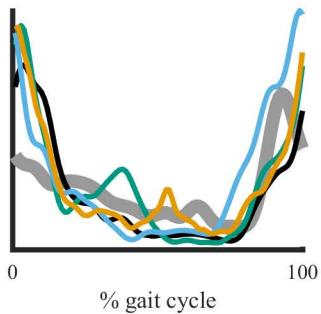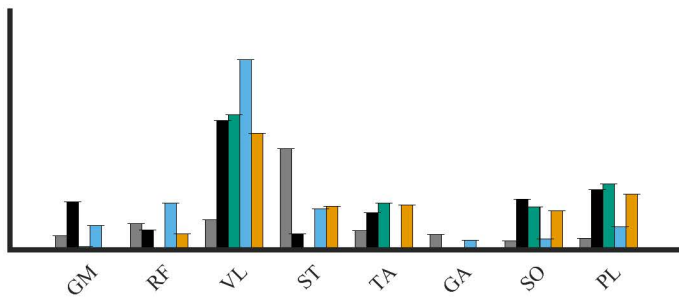

% gait cycle

TD
  Baseline
  Step Length
  Knee Extension
  Ankle Power

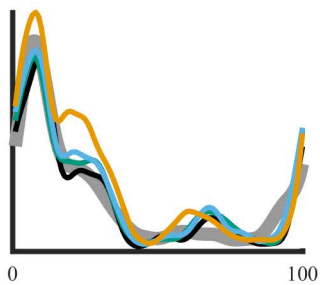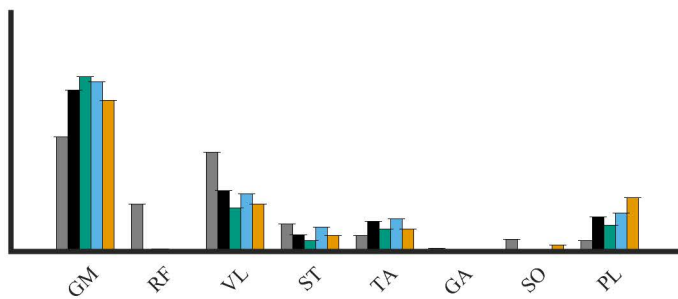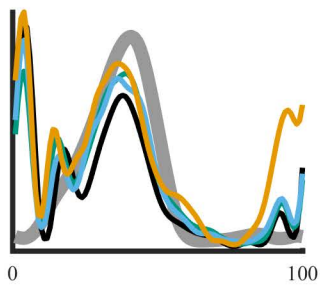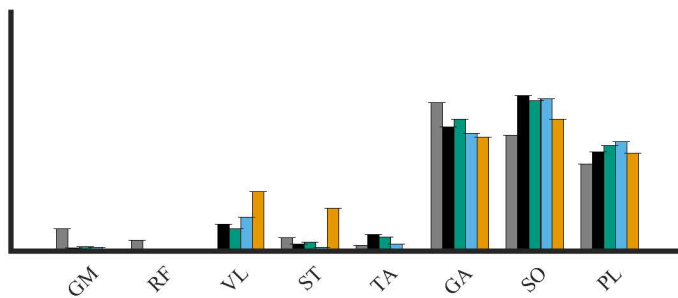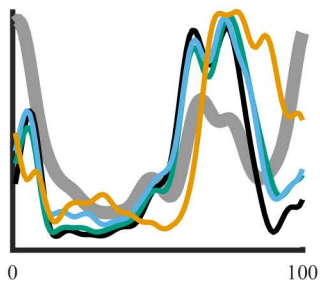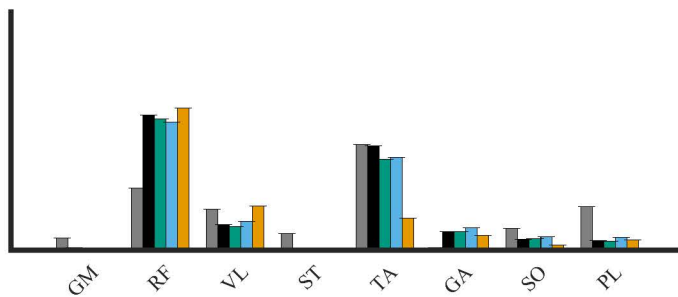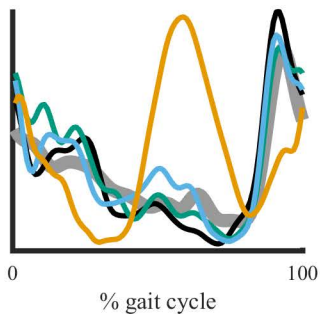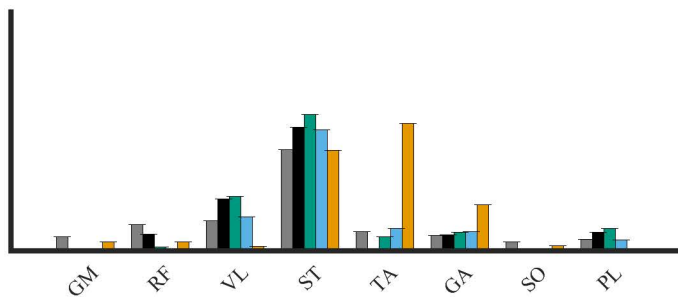

% gait cycle
